# Supplementary material for: The rise of the Himalaya enforced the diversification of SE Asian ferns by altering the monsoon regimes
Source: PubMed Central journal article supplement (PMC3508991; doi:10.1186/1471-2229-12-210), 2012-11-09

## Histogram of a null distribution of gamma statistic

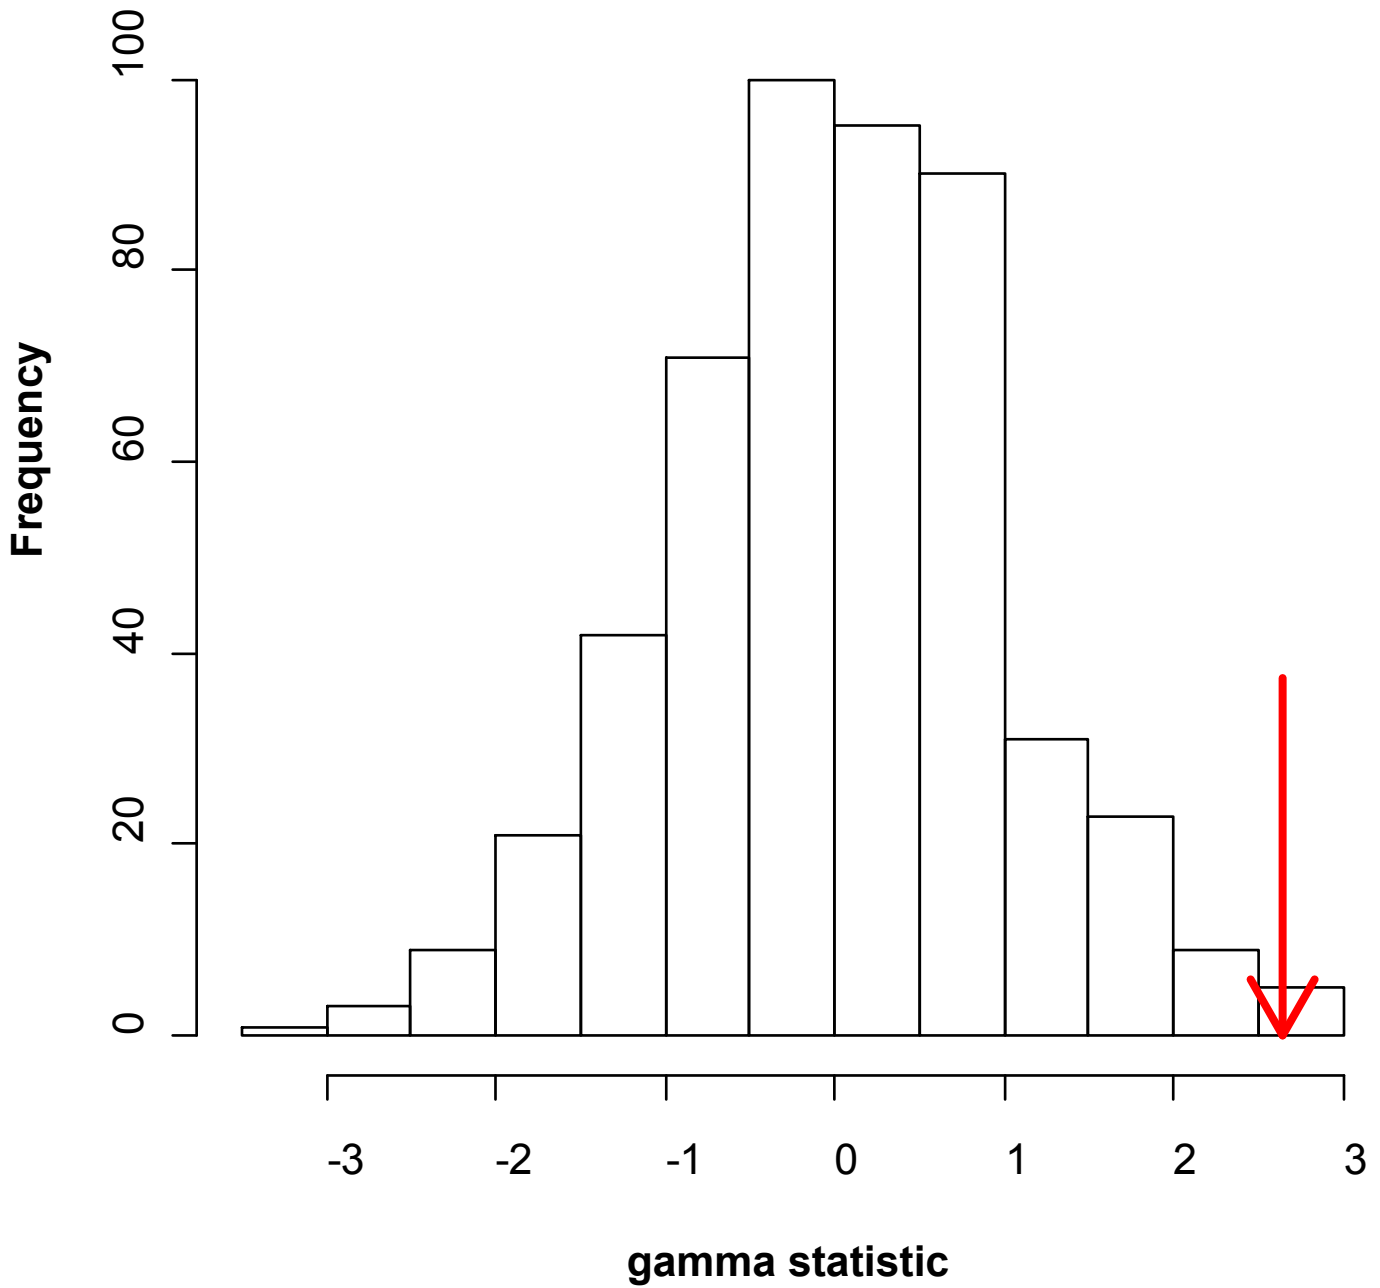

Supplement: 1471-2229-12-210-S1.pdf [file 1471-2229-12-210-S1.pdf]
